# Supplementary material for: Textbook Oncological Outcomes for Robotic Colorectal Cancer Resections: An Observational Study of Five Robotic Colorectal Units
Source: MDPI journal article supplement (doi:10.3390/cancers15153760), 2023-07-25
Supplement: s1 [file s1]

Supplementary Table S1. Missing values as percentage (%).

|                       | Missing |         |
|-----------------------|---------|---------|
|                       | N       | Percent |
| Age                   | 108     | 21.56%  |
| BMI                   | 133     | 26.55%  |
| Sex                   | 0       | 0.0%    |
| Hospital              | 0       | 0.0%    |
| ASA 1/2 vs 3/4        | 119     | 23.8%   |
| RT (Y/N)              | 108     | 21.6%   |
| Procedure             | 0       | 0.0%    |
| Rectum                | 0       | 0.0%    |
| Anal verge distance   | 177     | 44.58%  |
| LN harvested          | 111     | 22.16%  |
| LN +ve                | 239     | 47.7%   |
| T1/2 vs T3/4          | 114     | 22.8%   |
| N1/2                  | 191     | 38.1%   |
| Convert               | 0       | 0.0%    |
| Death                 | 0       | 0.0%    |
| ClavienDindo $\geq 3$ | 0       | 0.0%    |
| LOS >14               | 0       | 0.0%    |
| LOS                   | 0       | 0.0%    |
| Readmission           | 0       | 0.0%    |
| R0/1                  | 0       | 0.0%    |
